# Supplementary material
Source: MDPI journal article supplement (https://www.mdpi.com/2073-4344/10/12/1411)
Supplement: s1 [file s1]

*Supplementary Materials*

# **Increasing the Efficiency of Optimized V-SBA-15 Catalysts in the Selective Oxidation of Methane to Formaldehyde by Artificial Neural Network Modelling**

**Benny Kunkel <sup>1,\*</sup>, Anke Kabelitz <sup>2</sup>, Ana Guilherme Buzanich <sup>2</sup> and Sebastian Wohlrab <sup>1,\*</sup>**

<sup>1</sup> Leibniz-Institut für Katalyse e.V. an der Universität Rostock, Albert-Einstein-Str. 29a, 18059 Rostock, Germany

<sup>2</sup> Bundesanstalt für Materialforschung und -Prüfung (BAM), Richard-Willstätter-Straße 11, 12489 Berlin, Germany; Anke.Kabelitz@bam.de (A.K.); Ana.Buzanich@bam.de (A.G.B.)

\* Correspondence: Benny.Kunkel@catalysis.de (B.K.); Sebastian.Wohlrab@catalysis.de (S.W.)

Formulae for the calculation of catalytic parameters:

$$X_{CH_4} = \sum_i Y_i \quad (S1)$$

$$S_i = \frac{Y_i}{X_{CH_4}} \cdot 100\% \quad (S2)$$

$$Y_i = \frac{\nu_i(c_i^P - c_i^E)}{c_{CH_4}^E} \cdot 100\% \quad (S3)$$

$$STY_{CH_2O} = \frac{1 \cdot 10^{-5} \cdot Y_{CH_2O} \cdot F_{CH_4} \cdot v_{CH_4}^{-1} \cdot M_{CH_2O}}{m_{cat}} \quad (S4)$$

Conversion of methane –  $X_{CH_4}$  [%]

Selectivity towards product i –  $S_i$  [%]

Yield of product i –  $Y_i$  [%]

Space-time yield of formaldehyde –  $STY_{CH_2O}$  [kg<sub>CH<sub>2</sub>O</sub>·kg<sub>cat</sub><sup>−1</sup>·h<sup>−1</sup>]

Stoichiometric number of component i –  $\nu_i$  [−]

Concentration of component i in the product/educt gas stream –  $c_i^P/c_i^E$  [%]

Flow of methane –  $F_{CH_4}$  [L·h<sup>−1</sup>]

Molar volume of methane –  $v_{CH_4}$  [L·mol<sup>−1</sup>]

Molar mass of formaldehyde –  $M_{CH_2O}$  [g·mol<sup>−1</sup>]

Catalyst mass –  $m_{cat}$  [kg]

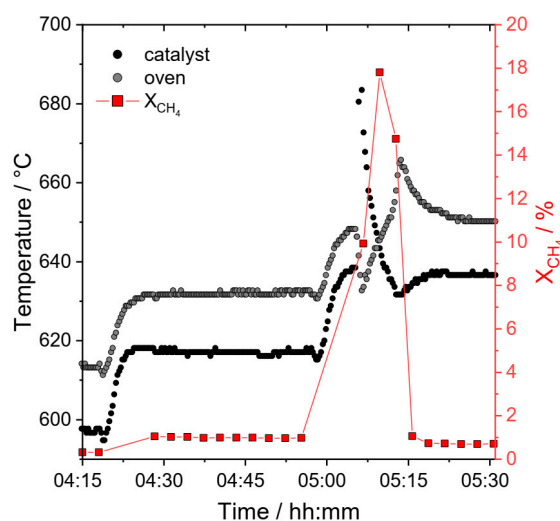

**Figure S1.** Temperature at the catalyst bed and oven and methane conversion over time. Reaction conditions: 25 mg, GHSV = 960,000 L·kg<sup>−1</sup>·h<sup>−1</sup>, CH<sub>4</sub>:O<sub>2</sub> 8:2, 20% H<sub>2</sub>O.

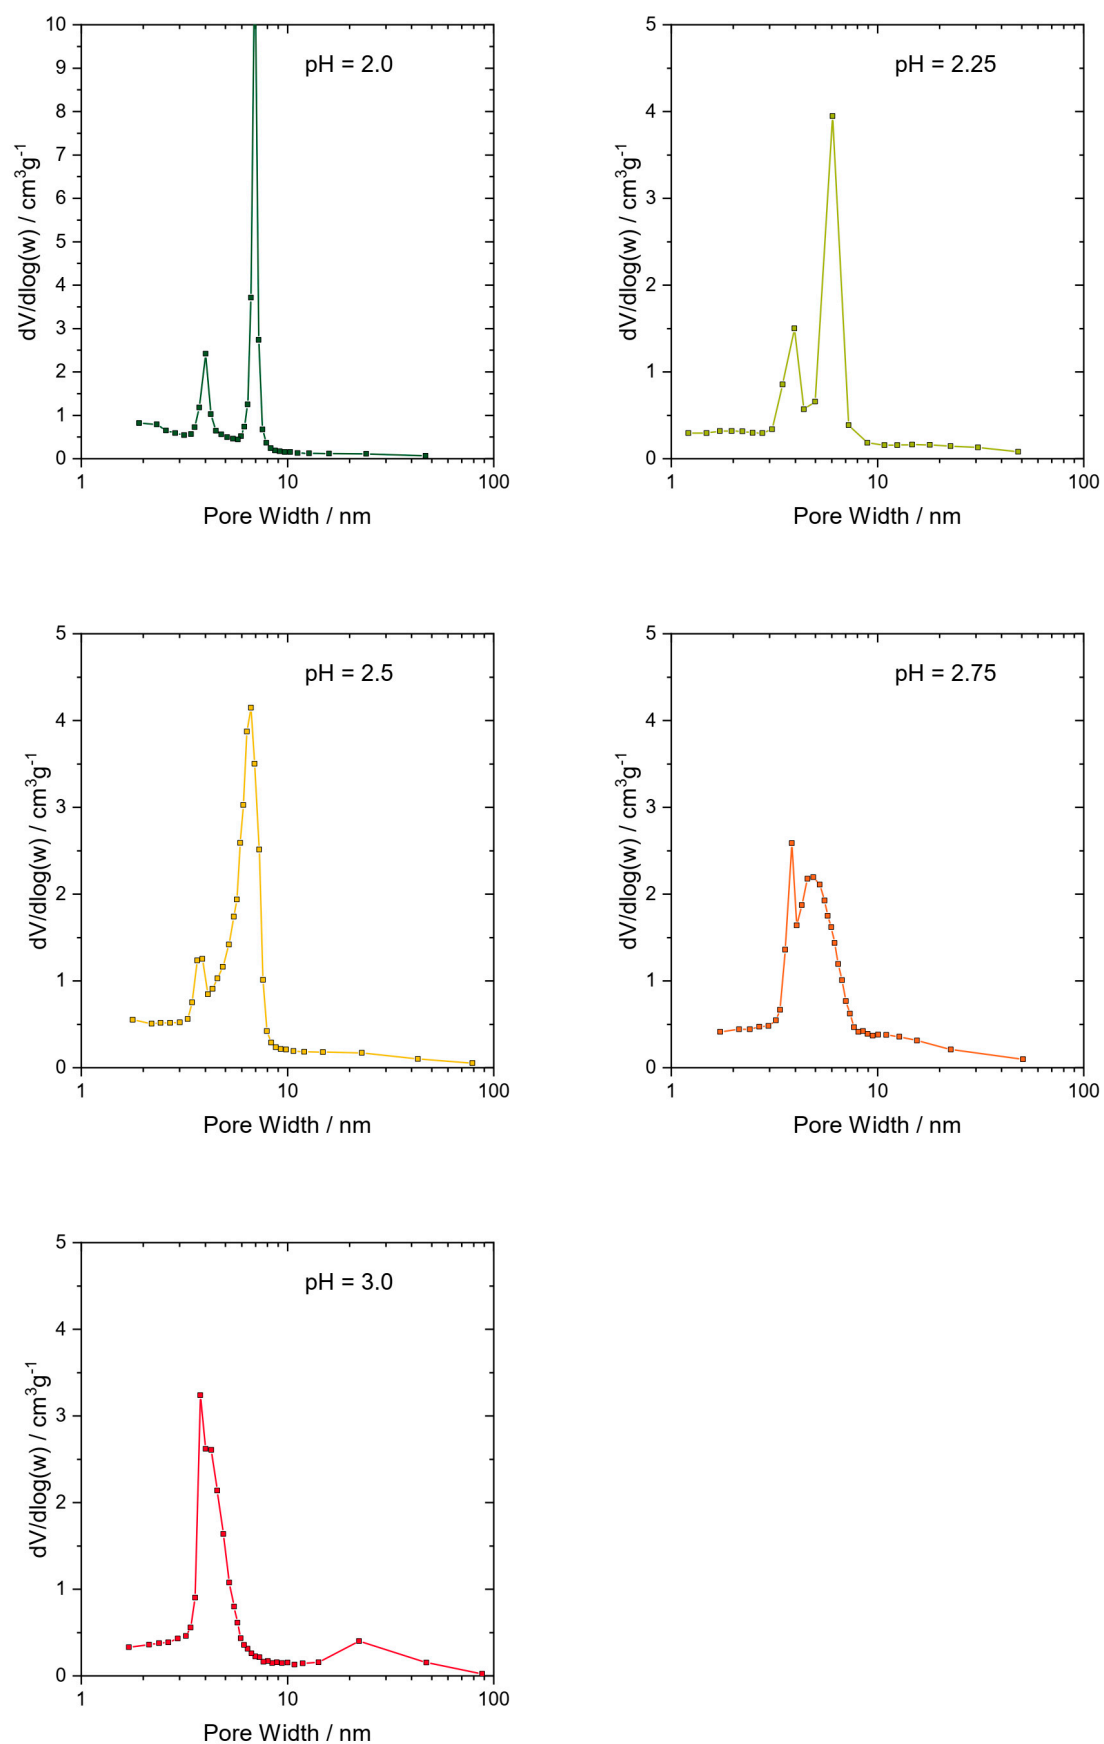

**Figure S2.** Pore size distribution of V-SBA-15 catalysts from BJH analyses.

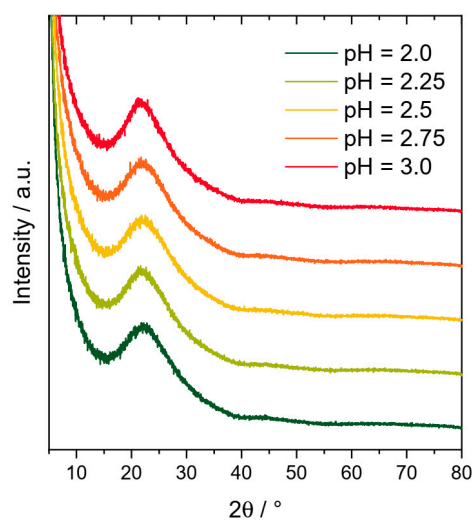

**Figure S3.** Wide-angle X-ray diffraction patterns of V-SBA-15 catalysts.

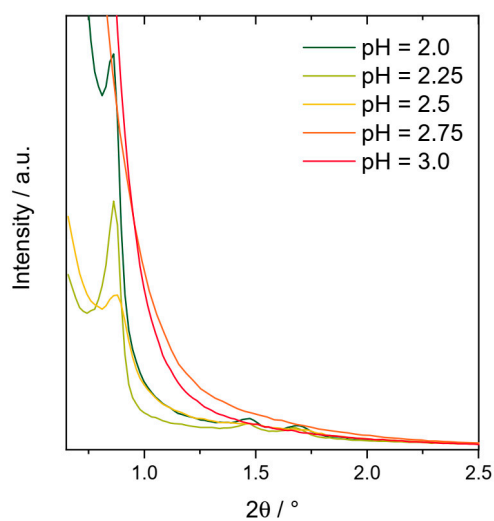

**Figure S4.** Small-angle X-ray diffraction patterns of V-SBA-15 catalysts.

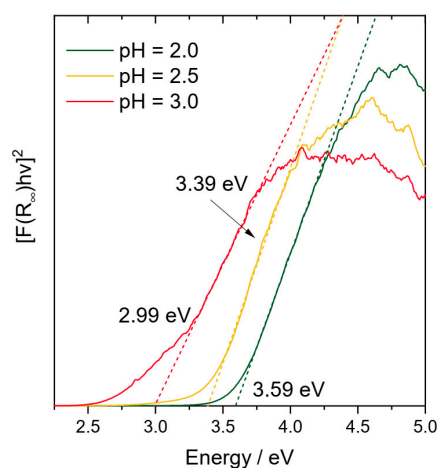

**Figure S5.** Tauc plots for UV-vis spectra of V-SBA-15(2.0), V-SBA-15(2.5) and V-SBA-15(3.0).

**Table S1.** Position ( $\lambda_{Cx}$ ) and ratio of the areas ( $A_x$ ) of the deconvoluted gaussians for UV-vis spectra of V-SBA-15(2.0), V-SBA-15(2.5) and V-SBA-15(3.0).

|                                | V-SBA-15(2.0) | V-SBA-15(2.5) | V-SBA-15(3.0) |
|--------------------------------|---------------|---------------|---------------|
| $\lambda_{C1}$ / nm; $A_1$ / % | 244; 24       | 247; 22       | 243; 16       |
| $\lambda_{C2}$ / nm; $A_2$ / % | 291; 67       | 303; 60       | 301; 42       |
| $\lambda_{C3}$ / nm; $A_3$ / % | 374; 9        | 387; 18       | 387; 42       |

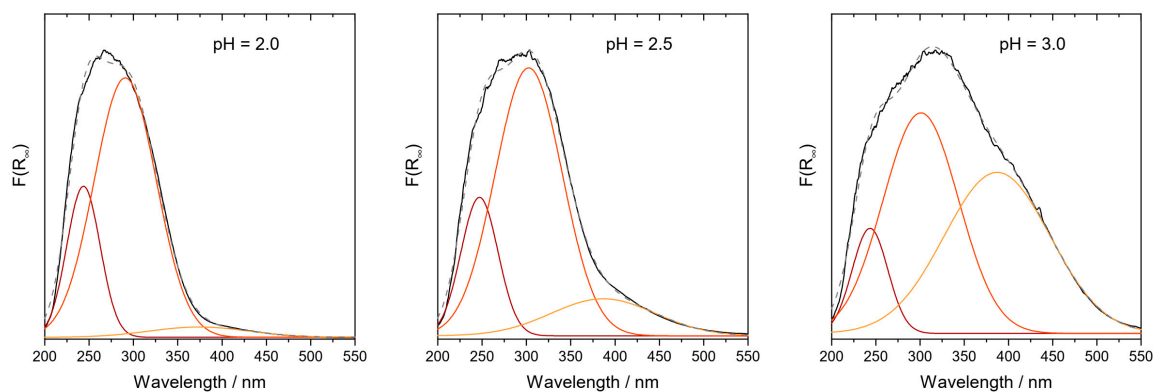

**Figure S6.** Deconvoluted UV-vis spectra of V-SBA-15(2.0), V-SBA-15(2.5) and V-SBA-15(3.0). Black – experimental spectrum; Grey dashed – sum of gaussians; Red/Orange/Yellow – gaussians.

**Table S2.** Pre-edge peak position of V-SBA-15 materials and reference compounds.

| Material                        | Pre-edge peak position / eV |
|---------------------------------|-----------------------------|
| NH <sub>4</sub> VO <sub>3</sub> | 5468.46                     |
| V-SBA-15 (2.0)                  | 5469.49                     |
| V-SBA-15 (2.25)                 | 5469.49                     |
| V-SBA-15 (2.5)                  | 5469.49                     |
| V-SBA-15 (2.75)                 | 5469.49                     |
| V-SBA-15 (3.0)                  | 5469.49                     |
| V <sub>2</sub> O <sub>5</sub>   | 5469.50                     |

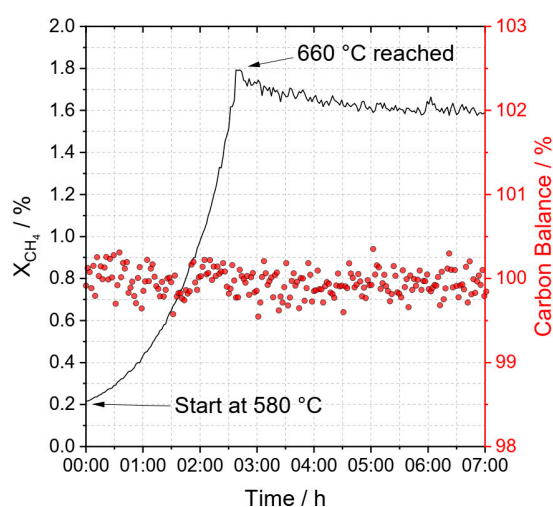

**Figure S7.** Methane conversion (black) and carbon balance (red) over time while heating up from 580 to 660 °C (heating rate 2 K·min<sup>-1</sup>) and maintaining 660 °C. The carbon balance is calculated as ratio of carbon concentration in the product gas measured at the respective temperature to the sum of methane concentration measured at 200 °C. Reaction conditions: V-SBA-15(2.5), 720,000 L·kg<sup>-1</sup>·h<sup>-1</sup>, 90% CH<sub>4</sub> and 10% O<sub>2</sub>.

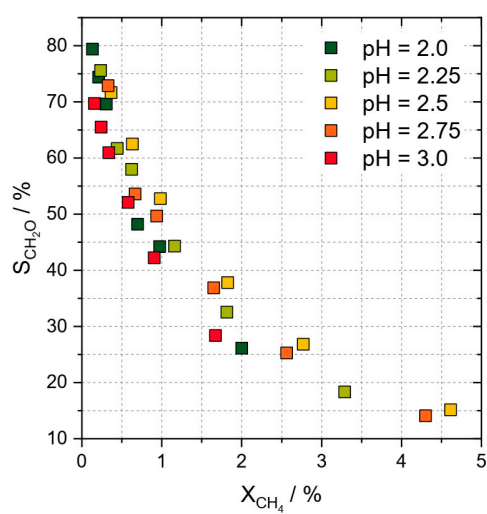

**Figure S8.** Formaldehyde selectivity vs. methane conversion plot at 620 °C (25 mg, GHSV = 720,000–120,000 L·kg<sup>-1</sup>·h<sup>-1</sup>, CH<sub>4</sub>:O<sub>2</sub> 9:1).

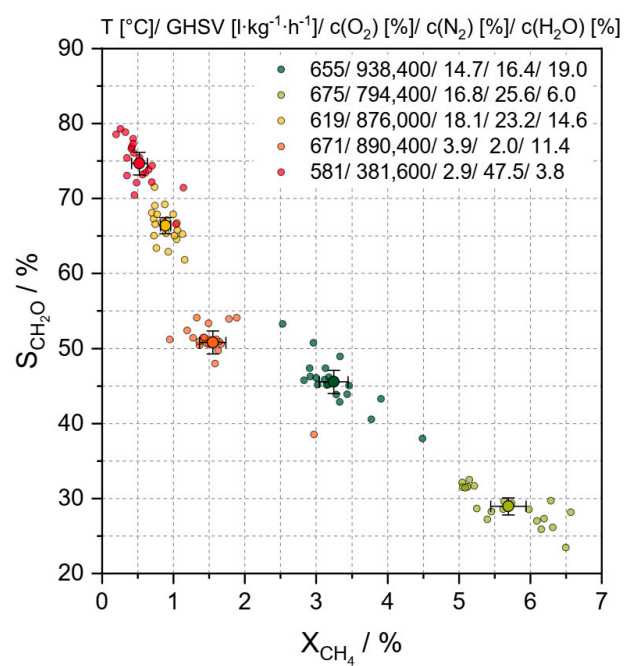

**Figure S9.** Output of the 20 single neural networks at five different conditions. The big markers indicate the average value and the whiskers represent 95% confidence interval.

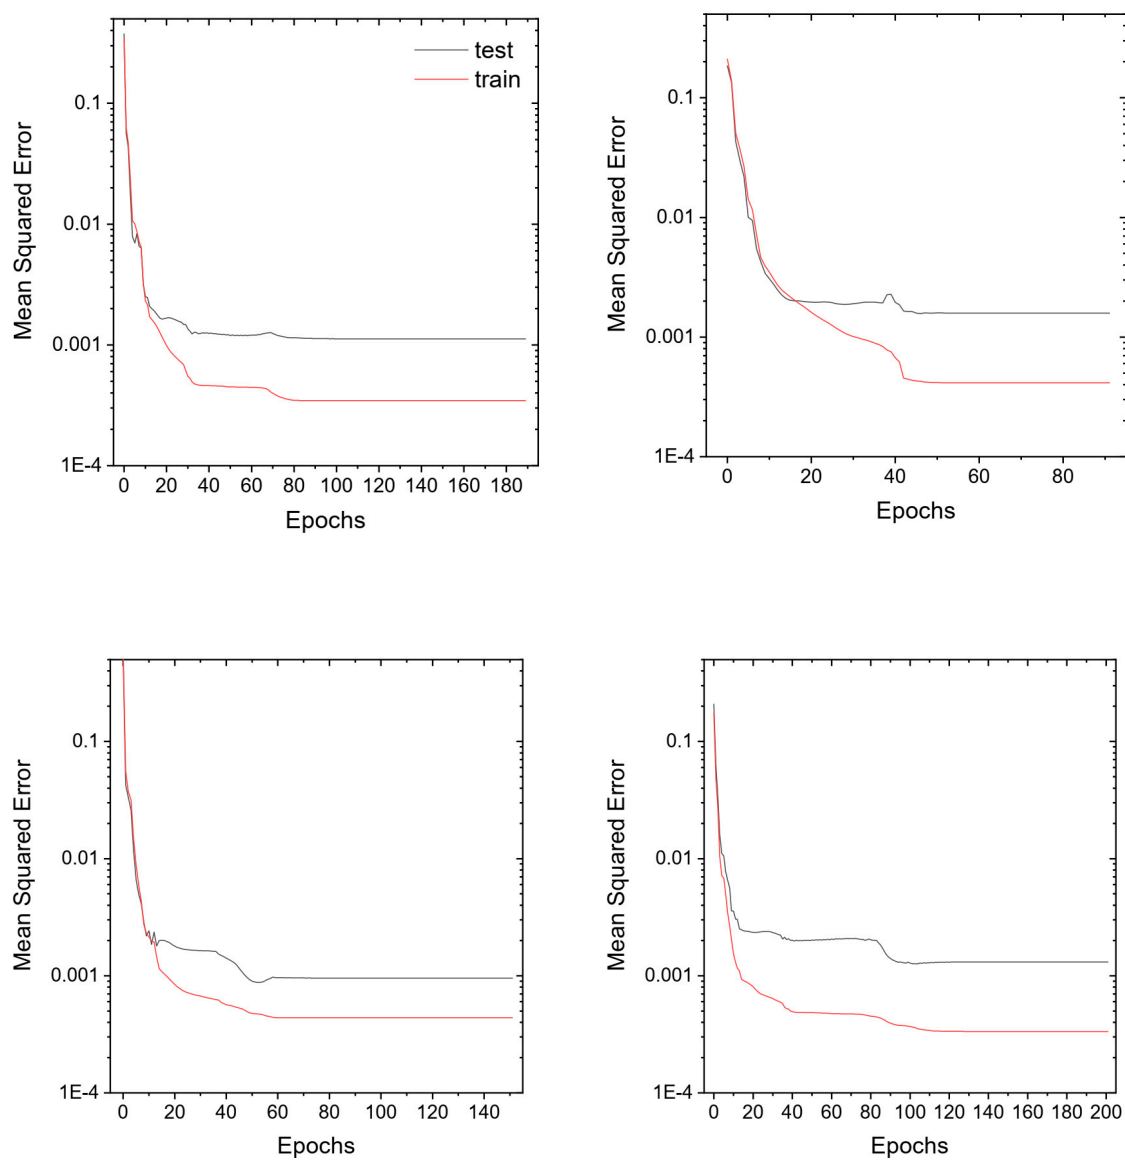

**Figure S10.** Performance of 5-10-2-2 neural networks in combination with BR learning on training and test data at different stages of the learning process. Data were randomly divided into training (75%) and test set (25%).



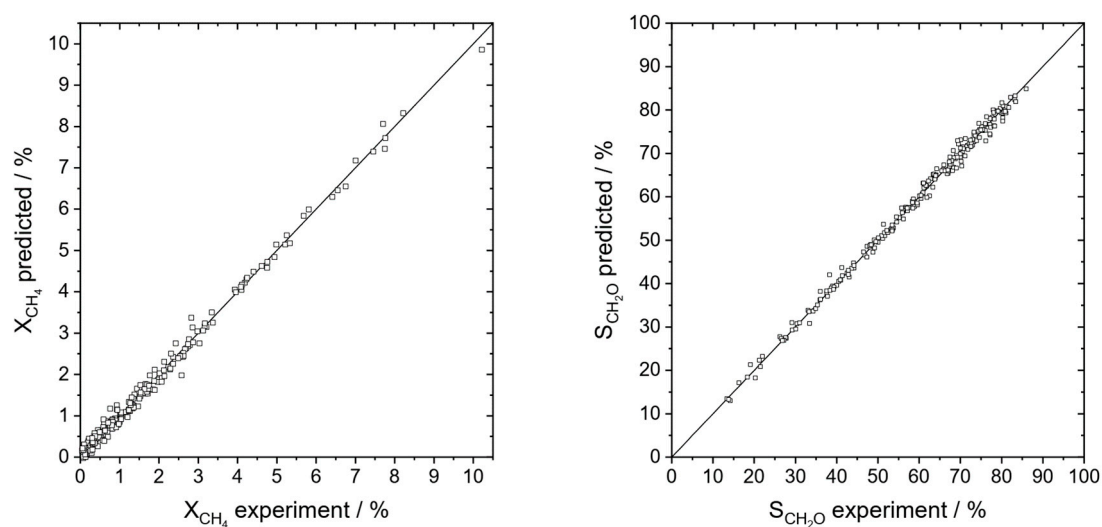

**Figure S11.** Correlation of predicted and experimental methane conversion and formaldehyde selectivity. Identity function is shown for comparison.

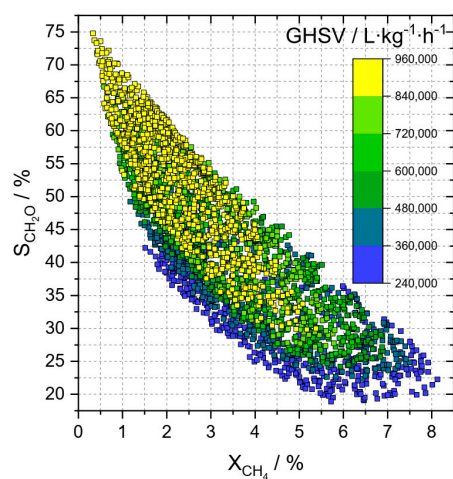

**Figure S12.** Predicted selectivity and conversion at 660 °C over the whole input range. Markers are coloured by GHSV.

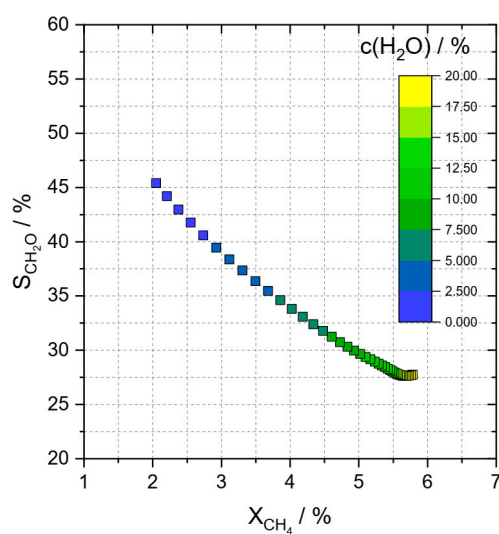

**Figure S13.** Predicted selectivity and conversion at 660 °C, 720,000 L·kg<sup>-1</sup>·h<sup>-1</sup>, 15% O<sub>2</sub> and 20% (N<sub>2</sub> + H<sub>2</sub>O).

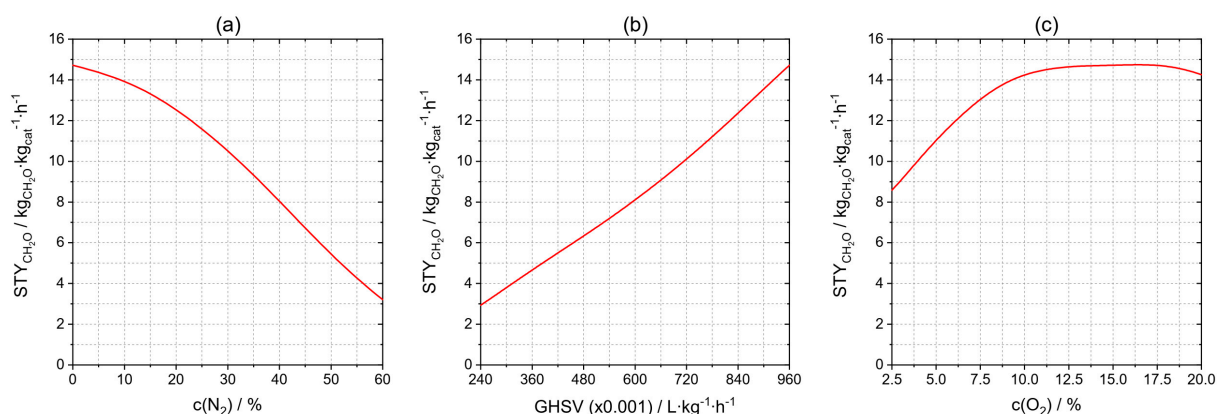

**Figure S14.** Predicted space-time yield at 680 °C, 960,000 L·kg<sup>-1</sup>·h<sup>-1</sup>, 15% O<sub>2</sub> and 20% H<sub>2</sub>O with varying nitrogen dilution (a), GHSV (b) or oxygen concentration (c).

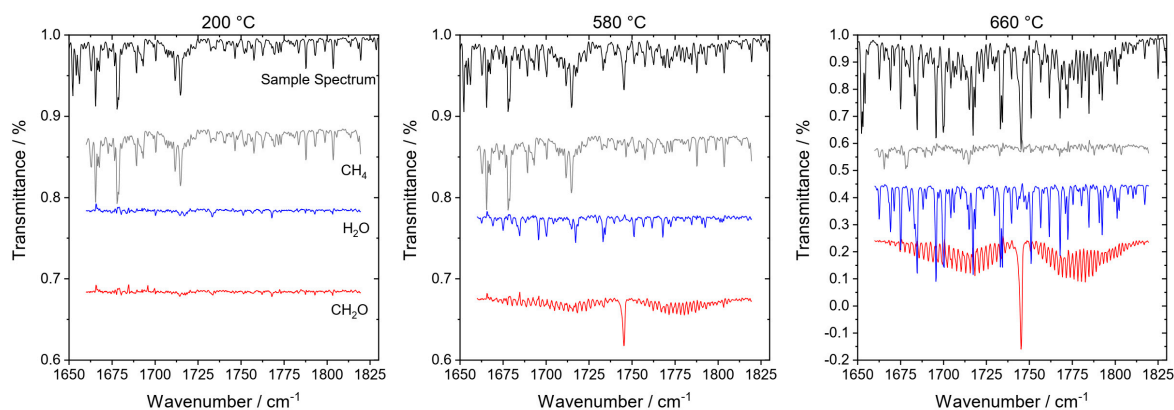

**Figure S15.** IR spectra of product gas obtained at different temperatures at 720,000 L·kg<sup>-1</sup>·h<sup>-1</sup> and 10% O<sub>2</sub>. Shown are the measured sample spectrum (black) as well as the fitted contributions of CH<sub>4</sub> (grey), H<sub>2</sub>O (blue) and CH<sub>2</sub>O (red).

Table S3. Training data for the neural network.

| T / °C | GHSV / L·kg <sup>-1</sup> ·h <sup>-1</sup> | c(O <sub>2</sub> ) <sup>a</sup> / % | c(N <sub>2</sub> ) <sup>b</sup> / % | c(H <sub>2</sub> O) <sup>b</sup> / % | X <sub>CH<sub>4</sub></sub> / % | S <sub>CH<sub>2</sub>O</sub> / % |
|--------|--------------------------------------------|-------------------------------------|-------------------------------------|--------------------------------------|---------------------------------|----------------------------------|
| 580    | 240,000                                    | 5                                   | 20                                  | 2.5                                  | 0.54968                         | 70.19706                         |
| 600    | 240,000                                    | 5                                   | 20                                  | 2.5                                  | 1.02036                         | 61.82707                         |
| 620    | 240,000                                    | 5                                   | 20                                  | 2.5                                  | 1.62472                         | 53.22689                         |
| 640    | 240,000                                    | 5                                   | 20                                  | 2.5                                  | 2.24334                         | 42.54023                         |
| 660    | 240,000                                    | 5                                   | 20                                  | 2.5                                  | 2.7904                          | 33.09023                         |
| 680    | 240,000                                    | 5                                   | 20                                  | 2.5                                  | 3.21052                         | 26.24107                         |
| 580    | 240,000                                    | 15                                  | 20                                  | 10                                   | 0.65282                         | 68.14057                         |
| 600    | 240,000                                    | 15                                  | 20                                  | 10                                   | 1.38387                         | 51.35819                         |
| 620    | 240,000                                    | 15                                  | 20                                  | 10                                   | 2.76549                         | 39.99169                         |
| 640    | 240,000                                    | 15                                  | 20                                  | 10                                   | 4.62132                         | 26.83839                         |
| 660    | 240,000                                    | 15                                  | 20                                  | 10                                   | 6.55504                         | 18.34626                         |
| 680    | 240,000                                    | 15                                  | 20                                  | 10                                   | 7.7072                          | 14.18006                         |
| 580    | 240,000                                    | 20                                  | 40                                  | 5                                    | 0.62364                         | 76.15251                         |
| 600    | 240,000                                    | 20                                  | 40                                  | 5                                    | 1.33417                         | 60.95622                         |
| 620    | 240,000                                    | 20                                  | 40                                  | 5                                    | 2.61484                         | 51.18517                         |
| 640    | 240,000                                    | 20                                  | 40                                  | 5                                    | 4.4075                          | 35.97764                         |
| 660    | 240,000                                    | 20                                  | 40                                  | 5                                    | 7.00916                         | 22.05047                         |
| 680    | 240,000                                    | 20                                  | 40                                  | 5                                    | 10.21701                        | 13.40938                         |
| 580    | 240,000                                    | 15                                  | 60                                  | 0                                    | 0.42286                         | 63.40421                         |
| 600    | 240,000                                    | 15                                  | 60                                  | 0                                    | 0.88599                         | 56.30939                         |
| 620    | 240,000                                    | 15                                  | 60                                  | 0                                    | 1.56382                         | 48.85086                         |
| 640    | 240,000                                    | 15                                  | 60                                  | 0                                    | 2.36487                         | 37.61487                         |
| 660    | 240,000                                    | 15                                  | 60                                  | 0                                    | 3.34609                         | 29.24018                         |
| 680    | 240,000                                    | 15                                  | 60                                  | 0                                    | 4.76277                         | 21.25642                         |
| 580    | 480,000                                    | 5                                   | 60                                  | 5                                    | 0.34127                         | 75.73964                         |
| 600    | 480,000                                    | 5                                   | 60                                  | 5                                    | 0.65109                         | 70.3295                          |
| 620    | 480,000                                    | 5                                   | 60                                  | 5                                    | 1.01026                         | 63.63907                         |
| 640    | 480,000                                    | 5                                   | 60                                  | 5                                    | 1.35432                         | 56.73608                         |
| 660    | 480,000                                    | 5                                   | 60                                  | 5                                    | 1.6588                          | 50.03626                         |
| 680    | 480,000                                    | 5                                   | 60                                  | 5                                    | 1.89538                         | 43.08058                         |
| 580    | 480,000                                    | 15                                  | 20                                  | 5                                    | 0.35438                         | 77.88303                         |
| 600    | 480,000                                    | 15                                  | 20                                  | 5                                    | 0.79819                         | 68.31164                         |
| 620    | 480,000                                    | 15                                  | 20                                  | 5                                    | 1.66811                         | 59.18766                         |
| 640    | 480,000                                    | 15                                  | 20                                  | 5                                    | 2.98266                         | 42.83965                         |
| 660    | 480,000                                    | 15                                  | 20                                  | 5                                    | 5.21696                         | 27.77735                         |
| 680    | 480,000                                    | 15                                  | 20                                  | 5                                    | 7.46041                         | 16.32157                         |
| 580    | 240,000                                    | 2.5                                 | 0                                   | 15                                   | 0.47206                         | 71.70366                         |
| 600    | 240,000                                    | 2.5                                 | 0                                   | 15                                   | 1.00559                         | 67.04664                         |
| 620    | 240,000                                    | 2.5                                 | 0                                   | 15                                   | 1.47403                         | 56.8505                          |
| 640    | 240,000                                    | 2.5                                 | 0                                   | 15                                   | 1.81211                         | 47.38603                         |
| 660    | 240,000                                    | 2.5                                 | 0                                   | 15                                   | 2.01195                         | 40.48819                         |
| 680    | 240,000                                    | 2.5                                 | 0                                   | 15                                   | 2.13524                         | 34.30984                         |
| 580    | 240,000                                    | 10                                  | 40                                  | 15                                   | 0.20765                         | 75.34681                         |
| 600    | 240,000                                    | 10                                  | 40                                  | 15                                   | 0.71948                         | 70.24263                         |
| 620    | 240,000                                    | 10                                  | 40                                  | 15                                   | 1.44713                         | 56.08164                         |
| 640    | 240,000                                    | 10                                  | 40                                  | 15                                   | 2.43174                         | 44.22532                         |
| 660    | 240,000                                    | 10                                  | 40                                  | 15                                   | 4.1066                          | 29.18206                         |
| 680    | 240,000                                    | 10                                  | 40                                  | 15                                   | 5.25429                         | 19.12338                         |
| 580    | 240,000                                    | 20                                  | 40                                  | 0                                    | 0.35232                         | 61.23143                         |
| 600    | 240,000                                    | 20                                  | 40                                  | 0                                    | 0.82224                         | 53.79426                         |

|     |         |     |    |     |         |          |
|-----|---------|-----|----|-----|---------|----------|
| 620 | 240,000 | 20  | 40 | 0   | 1.52826 | 41.36866 |
| 640 | 240,000 | 20  | 40 | 0   | 2.85911 | 30.41555 |
| 660 | 240,000 | 20  | 40 | 0   | 4.98702 | 21.5088  |
| 680 | 240,000 | 20  | 40 | 0   | 7.74955 | 13.81935 |
| 580 | 240,000 | 5   | 40 | 2.5 | 0.60383 | 77.21426 |
| 600 | 240,000 | 5   | 40 | 2.5 | 1.05714 | 64.24443 |
| 620 | 240,000 | 5   | 40 | 2.5 | 1.71716 | 57.19379 |
| 640 | 240,000 | 5   | 40 | 2.5 | 2.28593 | 46.90609 |
| 660 | 240,000 | 5   | 40 | 2.5 | 2.74108 | 37.77518 |
| 680 | 240,000 | 5   | 40 | 2.5 | 3.16406 | 30.06403 |
| 580 | 960,000 | 10  | 20 | 20  | 0.04426 | 69.56067 |
| 600 | 960,000 | 10  | 20 | 20  | 0.26728 | 70.53118 |
| 620 | 960,000 | 10  | 20 | 20  | 0.7519  | 68.36957 |
| 640 | 960,000 | 10  | 20 | 20  | 1.58966 | 62.55887 |
| 660 | 960,000 | 10  | 20 | 20  | 2.69923 | 49.12469 |
| 680 | 960,000 | 10  | 20 | 20  | 3.93543 | 36.04715 |
| 580 | 480,000 | 5   | 60 | 2.5 | 0.38821 | 77.00651 |
| 600 | 480,000 | 5   | 60 | 2.5 | 0.68795 | 72.93438 |
| 620 | 480,000 | 5   | 60 | 2.5 | 1.04515 | 66.80394 |
| 640 | 480,000 | 5   | 60 | 2.5 | 1.36035 | 55.79572 |
| 660 | 480,000 | 5   | 60 | 2.5 | 1.70189 | 48.27643 |
| 680 | 480,000 | 5   | 60 | 2.5 | 2.08    | 40.99325 |
| 580 | 720,000 | 5   | 0  | 0   | 0.08026 | 85.95162 |
| 600 | 720,000 | 5   | 0  | 0   | 0.16957 | 83.17699 |
| 620 | 720,000 | 5   | 0  | 0   | 0.29908 | 80.27844 |
| 640 | 720,000 | 5   | 0  | 0   | 0.45749 | 70.66352 |
| 660 | 720,000 | 5   | 0  | 0   | 0.68615 | 61.15611 |
| 680 | 720,000 | 5   | 0  | 0   | 1.15863 | 51.65804 |
| 580 | 720,000 | 5   | 60 | 0   | 0.10968 | 79.73874 |
| 600 | 720,000 | 5   | 60 | 0   | 0.17585 | 77.6854  |
| 620 | 720,000 | 5   | 60 | 0   | 0.26906 | 74.70115 |
| 640 | 720,000 | 5   | 60 | 0   | 0.38363 | 71.61476 |
| 660 | 720,000 | 5   | 60 | 0   | 0.52816 | 65.9006  |
| 680 | 720,000 | 5   | 60 | 0   | 0.76638 | 58.39986 |
| 580 | 480,000 | 20  | 20 | 0   | 0.09497 | 77.96401 |
| 600 | 480,000 | 20  | 20 | 0   | 0.23266 | 75.40855 |
| 620 | 480,000 | 20  | 20 | 0   | 0.53185 | 70.36555 |
| 640 | 480,000 | 20  | 20 | 0   | 1.03286 | 55.19969 |
| 660 | 480,000 | 20  | 20 | 0   | 2.58076 | 38.25356 |
| 680 | 480,000 | 20  | 20 | 0   | 2.82836 | 33.43277 |
| 580 | 960,000 | 10  | 40 | 0   | 0.05699 | 82.20959 |
| 600 | 960,000 | 10  | 40 | 0   | 0.12625 | 80.41804 |
| 620 | 960,000 | 10  | 40 | 0   | 0.24549 | 77.21901 |
| 640 | 960,000 | 10  | 40 | 0   | 0.39302 | 73.80242 |
| 660 | 960,000 | 10  | 40 | 0   | 0.60609 | 67.181   |
| 680 | 960,000 | 10  | 40 | 0   | 0.93185 | 54.55336 |
| 580 | 720,000 | 2.5 | 20 | 0   | 0.14465 | 78.10866 |
| 600 | 720,000 | 2.5 | 20 | 0   | 0.22697 | 75.48013 |
| 620 | 720,000 | 2.5 | 20 | 0   | 0.32689 | 70.72512 |
| 640 | 720,000 | 2.5 | 20 | 0   | 0.45184 | 63.50452 |
| 660 | 720,000 | 2.5 | 20 | 0   | 0.59178 | 55.95905 |
| 680 | 720,000 | 2.5 | 20 | 0   | 0.76444 | 48.10208 |

|     |         |     |    |     |         |          |
|-----|---------|-----|----|-----|---------|----------|
| 580 | 720,000 | 2.5 | 60 | 0   | 0.09464 | 78.98856 |
| 600 | 720,000 | 2.5 | 60 | 0   | 0.16256 | 78.21591 |
| 620 | 720,000 | 2.5 | 60 | 0   | 0.24921 | 76.05721 |
| 640 | 720,000 | 2.5 | 60 | 0   | 0.34194 | 72.62123 |
| 660 | 720,000 | 2.5 | 60 | 0   | 0.44657 | 67.37243 |
| 680 | 720,000 | 2.5 | 60 | 0   | 0.58838 | 60.80283 |
| 580 | 960,000 | 2.5 | 40 | 0   | 0.0784  | 80.08721 |
| 600 | 960,000 | 2.5 | 40 | 0   | 0.13428 | 81.2447  |
| 620 | 960,000 | 2.5 | 40 | 0   | 0.20912 | 79.9455  |
| 640 | 960,000 | 2.5 | 40 | 0   | 0.29164 | 77.15843 |
| 660 | 960,000 | 2.5 | 40 | 0   | 0.39197 | 72.17619 |
| 680 | 960,000 | 2.5 | 40 | 0   | 0.54252 | 65.51004 |
| 580 | 480,000 | 20  | 60 | 10  | 0.2185  | 76.35393 |
| 600 | 480,000 | 20  | 60 | 10  | 0.89883 | 73.32653 |
| 620 | 480,000 | 20  | 60 | 10  | 1.75972 | 63.95817 |
| 640 | 480,000 | 20  | 60 | 10  | 2.87576 | 54.61955 |
| 660 | 480,000 | 20  | 60 | 10  | 4.18625 | 43.68026 |
| 680 | 480,000 | 20  | 60 | 10  | 5.68692 | 33.29887 |
| 580 | 240,000 | 2.5 | 0  | 5   | 0.47694 | 72.57979 |
| 600 | 240,000 | 2.5 | 0  | 5   | 0.89881 | 66.28549 |
| 620 | 240,000 | 2.5 | 0  | 5   | 1.23854 | 57.45002 |
| 640 | 240,000 | 2.5 | 0  | 5   | 1.53153 | 48.07343 |
| 660 | 240,000 | 2.5 | 0  | 5   | 1.69773 | 40.86562 |
| 680 | 240,000 | 2.5 | 0  | 5   | 1.77401 | 34.95417 |
| 580 | 960,000 | 2.5 | 0  | 2.5 | 0.13875 | 83.30174 |
| 600 | 960,000 | 2.5 | 0  | 2.5 | 0.29057 | 81.79021 |
| 620 | 960,000 | 2.5 | 0  | 2.5 | 0.4462  | 75.16166 |
| 640 | 960,000 | 2.5 | 0  | 2.5 | 0.70399 | 70.37406 |
| 660 | 960,000 | 2.5 | 0  | 2.5 | 0.95539 | 60.96761 |
| 680 | 960,000 | 2.5 | 0  | 2.5 | 1.23616 | 50.93288 |
| 580 | 480,000 | 2.5 | 0  | 20  | 0.18785 | 72.68632 |
| 600 | 480,000 | 2.5 | 0  | 20  | 0.46056 | 70.04231 |
| 620 | 480,000 | 2.5 | 0  | 20  | 0.81185 | 62.7882  |
| 640 | 480,000 | 2.5 | 0  | 20  | 1.33753 | 58.90944 |
| 660 | 480,000 | 2.5 | 0  | 20  | 1.7428  | 50.1269  |
| 680 | 480,000 | 2.5 | 0  | 20  | 2.01736 | 42.86687 |
| 580 | 480,000 | 5   | 20 | 2.5 | 0.27504 | 80.35802 |
| 600 | 480,000 | 5   | 20 | 2.5 | 0.49831 | 73.31007 |
| 620 | 480,000 | 5   | 20 | 2.5 | 0.82757 | 66.03315 |
| 640 | 480,000 | 5   | 20 | 2.5 | 1.30716 | 59.63009 |
| 660 | 480,000 | 5   | 20 | 2.5 | 1.7547  | 49.17821 |
| 680 | 480,000 | 5   | 20 | 2.5 | 2.28977 | 39.04641 |
| 580 | 720,000 | 5   | 20 | 20  | 0.06351 | 70.08682 |
| 600 | 720,000 | 5   | 20 | 20  | 0.34882 | 72.32361 |
| 620 | 720,000 | 5   | 20 | 20  | 0.73591 | 68.78576 |
| 640 | 720,000 | 5   | 20 | 20  | 1.26955 | 63.83378 |
| 660 | 720,000 | 5   | 20 | 20  | 1.85871 | 58.49169 |
| 680 | 720,000 | 5   | 20 | 20  | 2.36411 | 49.53248 |
| 580 | 960,000 | 20  | 20 | 5   | 0.0939  | 80.58218 |
| 600 | 960,000 | 20  | 20 | 5   | 0.2945  | 77.38163 |
| 620 | 960,000 | 20  | 20 | 5   | 0.62193 | 69.98584 |
| 640 | 960,000 | 20  | 20 | 5   | 1.23617 | 58.62883 |

|     |         |     |    |     |         |          |
|-----|---------|-----|----|-----|---------|----------|
| 660 | 960,000 | 20  | 20 | 5   | 2.66663 | 44.0993  |
| 580 | 960,000 | 2.5 | 0  | 15  | 0.09798 | 74.42529 |
| 600 | 960,000 | 2.5 | 0  | 15  | 0.2627  | 73.94932 |
| 620 | 960,000 | 2.5 | 0  | 15  | 0.47228 | 69.07511 |
| 640 | 960,000 | 2.5 | 0  | 15  | 0.73219 | 64.168   |
| 660 | 960,000 | 2.5 | 0  | 15  | 1.04394 | 60.47582 |
| 680 | 960,000 | 2.5 | 0  | 15  | 1.31243 | 53.46242 |
| 580 | 960,000 | 15  | 20 | 10  | 0.07785 | 74.48187 |
| 600 | 960,000 | 15  | 20 | 10  | 0.31328 | 73.61588 |
| 620 | 960,000 | 15  | 20 | 10  | 0.75025 | 68.47372 |
| 640 | 960,000 | 15  | 20 | 10  | 1.63401 | 61.91072 |
| 660 | 960,000 | 15  | 20 | 10  | 3.17345 | 47.30749 |
| 670 | 960,000 | 15  | 20 | 10  | 4.23021 | 37.61956 |
| 580 | 480,000 | 10  | 60 | 5   | 0.30032 | 81.09584 |
| 600 | 480,000 | 10  | 60 | 5   | 0.8182  | 77.16632 |
| 620 | 480,000 | 10  | 60 | 5   | 1.33835 | 67.84477 |
| 640 | 480,000 | 10  | 60 | 5   | 1.9728  | 58.77809 |
| 660 | 480,000 | 10  | 60 | 5   | 2.62494 | 48.40187 |
| 680 | 480,000 | 10  | 60 | 5   | 3.3741  | 38.69068 |
| 580 | 960,000 | 10  | 0  | 10  | 0.13032 | 75.40735 |
| 600 | 960,000 | 10  | 0  | 10  | 0.37198 | 71.80551 |
| 620 | 960,000 | 10  | 0  | 10  | 0.7554  | 61.27104 |
| 640 | 960,000 | 10  | 0  | 10  | 1.53782 | 51.63638 |
| 660 | 960,000 | 10  | 0  | 10  | 2.7419  | 39.40862 |
| 680 | 960,000 | 10  | 0  | 10  | 4.1179  | 27.62165 |
| 580 | 720,000 | 15  | 20 | 5   | 0.26017 | 79.16451 |
| 600 | 720,000 | 15  | 20 | 5   | 0.57012 | 73.33196 |
| 620 | 720,000 | 15  | 20 | 5   | 1.20722 | 67.00884 |
| 640 | 720,000 | 15  | 20 | 5   | 2.13033 | 52.32374 |
| 660 | 720,000 | 15  | 20 | 5   | 3.95843 | 35.37943 |
| 670 | 720,000 | 15  | 20 | 5   | 5.33443 | 26.52983 |
| 580 | 720,000 | 20  | 20 | 20  | 0.08367 | 73.03287 |
| 600 | 720,000 | 20  | 20 | 20  | 0.35042 | 69.26278 |
| 620 | 720,000 | 20  | 20 | 20  | 0.93421 | 61.66312 |
| 640 | 720,000 | 20  | 20 | 20  | 2.31289 | 53.55989 |
| 660 | 720,000 | 20  | 20 | 20  | 4.94285 | 38.40637 |
| 670 | 720,000 | 20  | 20 | 20  | 6.41788 | 31.03182 |
| 580 | 960,000 | 10  | 40 | 2.5 | 0.12668 | 83.43866 |
| 600 | 960,000 | 10  | 40 | 2.5 | 0.31561 | 80.86242 |
| 620 | 960,000 | 10  | 40 | 2.5 | 0.6103  | 78.14818 |
| 640 | 960,000 | 10  | 40 | 2.5 | 0.91476 | 70.05516 |
| 660 | 960,000 | 10  | 40 | 2.5 | 1.36334 | 61.12742 |
| 680 | 960,000 | 10  | 40 | 2.5 | 2.07349 | 53.47923 |
| 580 | 240,000 | 15  | 40 | 15  | 0.63281 | 72.63995 |
| 600 | 240,000 | 15  | 40 | 15  | 1.50421 | 62.26363 |
| 620 | 240,000 | 15  | 40 | 15  | 3.03582 | 52.42996 |
| 640 | 240,000 | 15  | 40 | 15  | 4.75216 | 39.25382 |
| 660 | 240,000 | 15  | 40 | 15  | 6.75668 | 27.20579 |
| 680 | 240,000 | 15  | 40 | 15  | 8.22181 | 20.25856 |
| 580 | 720,000 | 20  | 60 | 15  | 0.09721 | 80.29377 |
| 600 | 720,000 | 20  | 60 | 15  | 0.4979  | 71.20908 |
| 620 | 720,000 | 20  | 60 | 15  | 1.2404  | 67.56691 |

|     |         |    |    |    |         |          |
|-----|---------|----|----|----|---------|----------|
| 640 | 720,000 | 20 | 60 | 15 | 2.13985 | 60.08599 |
| 660 | 720,000 | 20 | 60 | 15 | 3.12515 | 52.1463  |
| 680 | 720,000 | 20 | 60 | 15 | 4.2462  | 44.21365 |
| 580 | 240,000 | 20 | 60 | 20 | 0.36344 | 74.9785  |
| 600 | 240,000 | 20 | 60 | 20 | 1.28344 | 67.90845 |
| 620 | 240,000 | 20 | 60 | 20 | 2.6325  | 59.54416 |
| 640 | 240,000 | 20 | 60 | 20 | 4.08906 | 46.51509 |
| 660 | 240,000 | 20 | 60 | 20 | 5.81344 | 36.08289 |
| 680 | 240,000 | 20 | 60 | 20 | 7.76703 | 26.84423 |
| 580 | 960,000 | 20 | 0  | 20 | 0.04711 | 69.37535 |
| 600 | 960,000 | 20 | 0  | 20 | 0.31768 | 71.12844 |
| 620 | 960,000 | 20 | 0  | 20 | 0.98208 | 63.33159 |
| 580 | 960,000 | 15 | 0  | 20 | 0.10444 | 72.56513 |
| 600 | 960,000 | 15 | 0  | 20 | 0.37931 | 69.04459 |
| 620 | 960,000 | 15 | 0  | 20 | 0.9467  | 57.13113 |
| 640 | 960,000 | 15 | 0  | 20 | 2.54853 | 41.26486 |
| 580 | 960,000 | 20 | 20 | 10 | 0.07503 | 76.08092 |
| 600 | 960,000 | 20 | 20 | 10 | 0.32121 | 74.61641 |
| 620 | 960,000 | 20 | 20 | 10 | 0.80717 | 67.31772 |
| 640 | 960,000 | 20 | 20 | 10 | 1.8981  | 58.43734 |
| 580 | 720,000 | 10 | 60 | 20 | 0.06153 | 78.32957 |
| 600 | 720,000 | 10 | 60 | 20 | 0.30389 | 72.46344 |
| 620 | 720,000 | 10 | 60 | 20 | 0.71037 | 67.50521 |
| 640 | 720,000 | 10 | 60 | 20 | 1.27236 | 64.01048 |
| 660 | 720,000 | 10 | 60 | 20 | 1.88486 | 60.49665 |
| 680 | 720,000 | 10 | 60 | 20 | 2.49153 | 56.2183  |

a – concentration relative to methane; b – absolute concentration.
